# Supplementary material for: Social Contact with Family and Non-Family Members Differentially Affects Physical Activity: A Parallel Latent Growth Curve Modeling Approach
Source: PubMed Central journal article supplement (PMC7956539; doi:10.3390/ijerph18052313), 2021-02-26
Supplement: ijerph-18-02313-s001.pdf [file ijerph-18-02313-s001.pdf]

Supplement table 1. Estimated coefficients of the multigroup analysis (Model 1) <sup>a</sup>.

|                                    | Male (n=606) |       |         | Female (n=789) |       |         | Gender difference    |
|------------------------------------|--------------|-------|---------|----------------|-------|---------|----------------------|
|                                    | $\beta$      | SE    | P-value | $\beta$        | SE    | P-value | P-value              |
| PA (Intercept)                     |              |       |         |                |       |         |                      |
| Overall social contact (Intercept) | 0.030        | 0.040 | 0.445   | 0.087          | 0.022 | <0.001  | 0.211                |
| PA (slope)                         |              |       |         |                |       |         |                      |
| Overall social contact (Intercept) | 0.015        | 0.010 | 0.136   | -0.003         | 0.006 | 0.625   | 0.124                |
| Overall social contact (Slope)     | 0.143        | 0.105 | 0.173   | 0.159          | 0.104 | 0.127   | 0.912                |
| CFI                                |              |       |         |                |       |         | 0.995                |
| TLI                                |              |       |         |                |       |         | 0.986                |
| RMSEA (90% CI)                     |              |       |         |                |       |         | 0.010 (0.001, 0.017) |

$\beta$ , unstandardized regression coefficient; SE, standard error; CFI, comparative fit index; TLI, Tucker–Lewis index; RMSEA, root mean square error of approximation; CI, confidence interval.

<sup>a</sup> Parallel latent growth curve model included physical activity as the dependent variable, frequency of contact with family/relatives/friends/neighbors as independent variables, sociodemographic factors (age, years of education, subjective economic status, marital status, employment status), health status (self-rated health, mental health, medical history), and health behavior (smoking status, alcohol consumption, eating habits) as covariates.

Supplement table 2. Estimated coefficients of the multigroup analysis (Model 2) <sup>a</sup>.

|                                                         | Male (n=606) |       |         | Female (n=789)       |       |         | Gender difference |
|---------------------------------------------------------|--------------|-------|---------|----------------------|-------|---------|-------------------|
|                                                         | $\beta$      | SE    | P-value | $\beta$              | SE    | P-value | P-value           |
| PA (Intercept)                                          |              |       |         |                      |       |         |                   |
| Frequency of contact with family/relatives (Intercept)  | -0.078       | 0.056 | 0.164   | 0.031                | 0.030 | 0.307   | 0.087             |
| Frequency of contact with friends/neighbors (Intercept) | 0.209        | 0.084 | 0.013   | 0.155                | 0.019 | <0.001  | 0.624             |
| PA (Slope)                                              |              |       |         |                      |       |         |                   |
| Frequency of contact with family/relatives (Intercept)  | 0.023        | 0.014 | 0.100   | 0.003                | 0.007 | 0.644   | 0.215             |
| Frequency of contact with friends/neighbors (Intercept) | 0.010        | 0.022 | 0.656   | -0.010               | 0.009 | 0.283   | 0.412             |
| Frequency of contact with family/relatives (Slope)      | 0.574        | 0.628 | 0.360   | 0.223                | 0.154 | 0.147   | 0.582             |
| Frequency of contact with friends/neighbors (Slope)     | 0.024        | 0.116 | 0.833   | 0.110                | 0.161 | 0.495   | 0.667             |
| CFI                                                     |              |       |         | 0.969                |       |         |                   |
| TLI                                                     |              |       |         | 0.937                |       |         |                   |
| RMSEA (90% CI)                                          |              |       |         | 0.022 (0.018, 0.026) |       |         |                   |

$\beta$ , unstandardized regression coefficient; SE, standard error; CFI, comparative fit index; TLI, Tucker–Lewis index; RMSEA, root mean square error of approximation; CI, confidence interval.

<sup>a</sup> Parallel latent growth curve model included physical activity as the dependent variable, frequency of contact with family/relatives and friends/neighbors as independent variables, sociodemographic factors (age, years of education, subjective economic status, marital status, employment status), health status (self-rated health, mental health, medical history), and health behavior (smoking status, alcohol consumption, eating habits) as covariates.
